# Supplementary material for: “Fuel for the Damage Induced”: Untargeted Metabolomics in Elite Rugby Union Match Play
Source: MDPI journal article supplement (doi:10.3390/metabo11080544), 2021-08-17
Supplement: s1 [file s1]

## Supplementary Information

The information supplied below is supplementary to the section 2.1 in the main manuscript relative to dietary intake of the participants during the study period.

**Table S1.** Macronutrient intake for each day of the match week displayed relative to body mass (g/kg) and overall energy intake as total kilocalories (kcal). \*Denotes significantly lower than GD, † denotes significantly lower than GD-1 after one-way repeated measures ANOVA and Tukey post-hoc correction.

| Time Point          | GD-2         | GD-1        | GD         | GD+1         | GD+2         | GD+3         | GD+4         | ANOVA (p-value) |
|---------------------|--------------|-------------|------------|--------------|--------------|--------------|--------------|-----------------|
| Carbohydrate (g/kg) | 2.52 ±0.30*† | 4.32 ±0.89* | 5.62 ±0.85 | 2.93 ±0.64*† | 2.11 ±0.42*† | 2.42 ±0.51*† | 2.25 ±0.68*† | p<0.0001        |
| Protein (g/kg)      | 2.55 ±0.39   | 2.37 ±0.48  | 2.20 ±0.24 | 2.15 ±0.62   | 2.62 ±0.30   | 2.45 ±0.30   | 2.37 ±0.85   | p=0.3743        |
| Fat (g/kg)          | 1.09 ±0.33   | 1.17 ±0.18  | 1.05 ±0.35 | 1.34 ±0.28   | 1.04 ±0.24   | 1.19 ±0.11   | 1.25 ±0.40   | p=0.3666        |
| Energy (kcal)       | 3042 ±326*†  | 3770 ±235   | 4288 ±624  | 3272 ±379*   | 2856 ±151*†  | 3060 ±216*†  | 2971 ±625    | p=0.0021        |
